# Supplementary material
Source: publisher figshare collection journal article supplement (https://gsapubs.figshare.com/ndownloader/files/22745315)

Document DR1. Sample rectified aerial photograph with overlain channel and flood-plain boundaries, Little Missouri River, North Unit of Theodore Roosevelt National Park, North Dakota. Photo date is August 15, 1949. The mean daily discharge for that date at the Little Missouri River near Watford City, North Dakota (US Geological Survey Station 06337000) was  $1.1 \text{ m}^3/\text{s}$ , a flow exceeded by 60% of days during the period of record (10/1/1934 – 9/30/2004). The photo was obtained from the National Archives and Records Administration as a black and white contact print with a scale of 1:20,000.

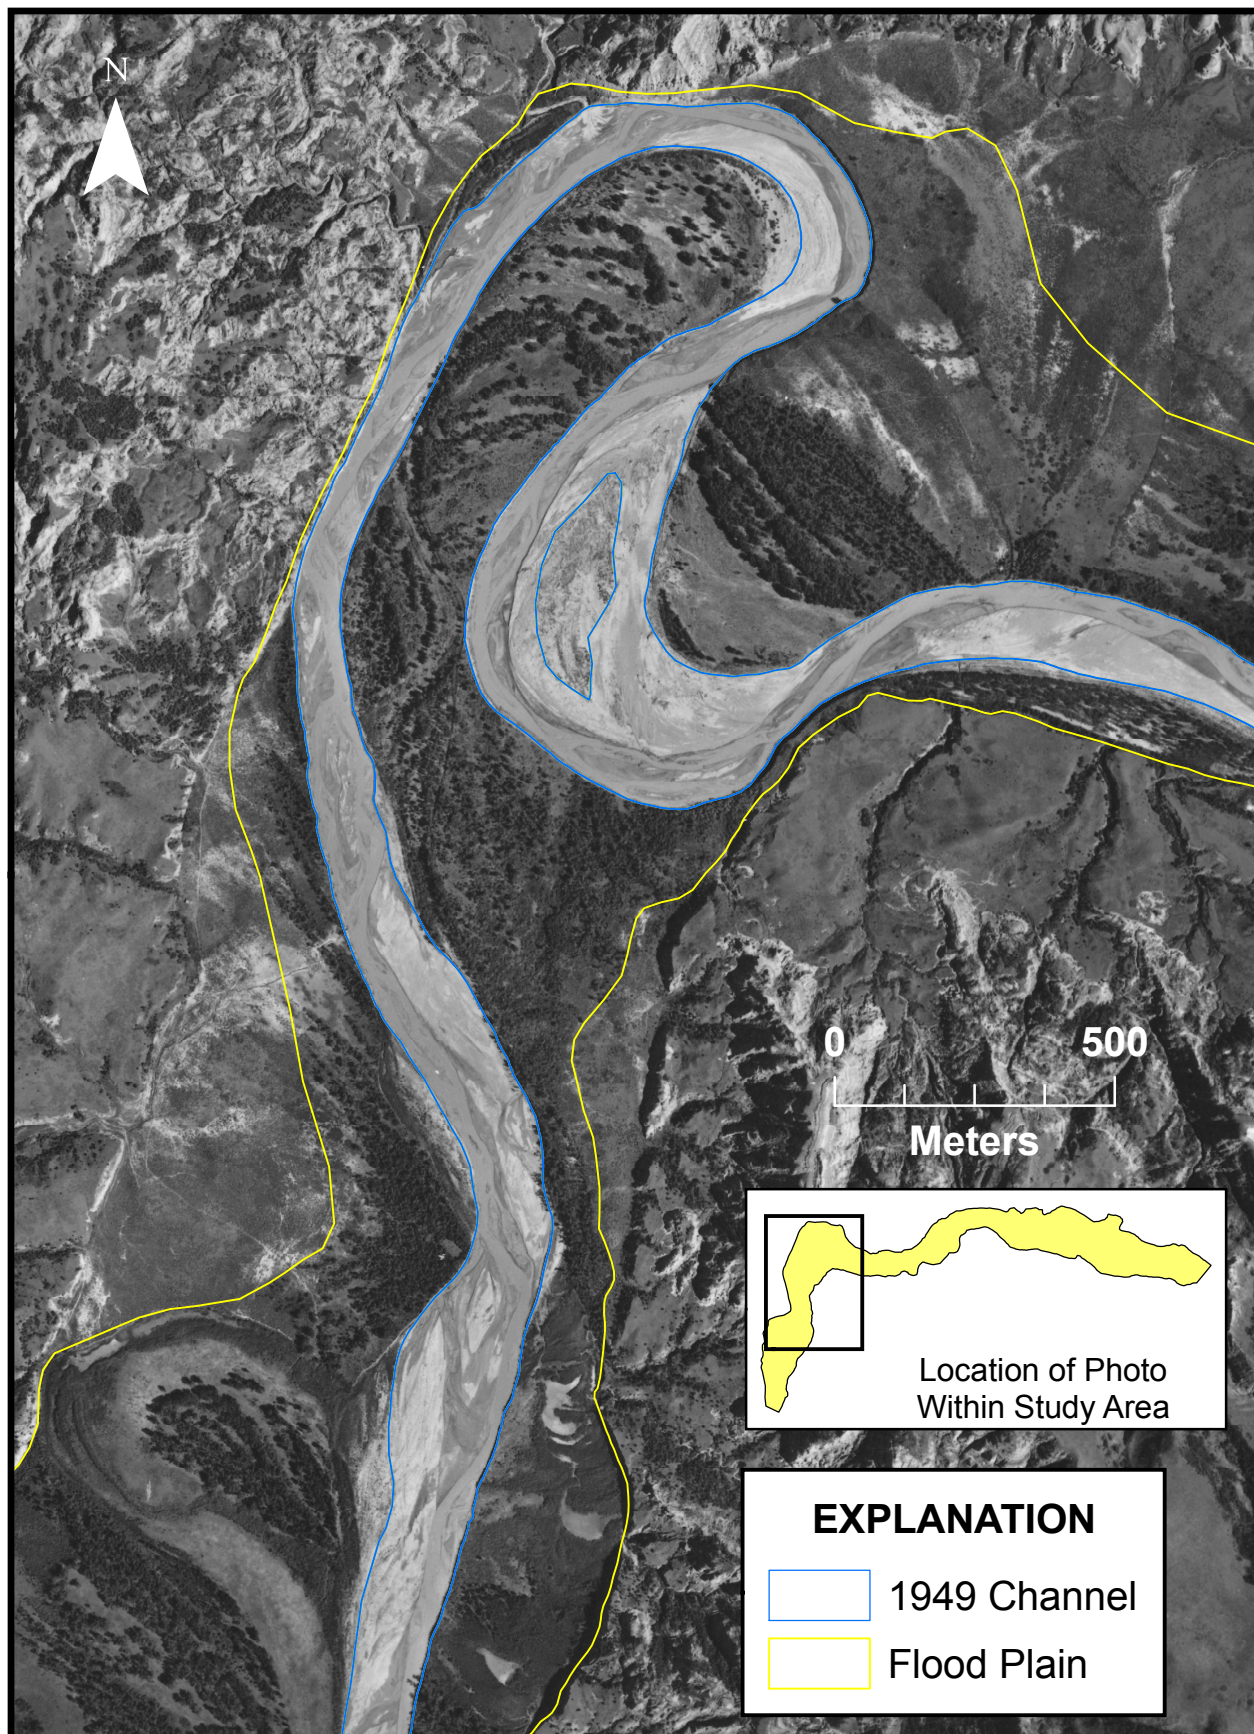

Supplement: Supplementary file 1 [file 22745315]
